# Supplementary material for: Simple synthesis of a CoMoS4based nanostructure and its application for high-performance supercapacitors
Source: Royal Society of Chemistry journal article supplement (doi:10.1039/c5ra26157k), 2016-01-01
Supplement: c5ra26157k1.pdf [file c5ra26157k1.pdf]

# Supporting information

1

2

3

## 4 **Simple synthesis of CoMoS<sub>4</sub> based nanostructure and its** 5 **application for high-performance supercapacitors**

6

7 **Yan-Hua Dai**<sup>1</sup>, **Ling-Bin Kong**<sup>1,2,\*</sup>, **Kun Yan**<sup>1</sup>, **Ming Shi**<sup>1</sup>, **Tong Zhang**<sup>1</sup>, **Yong-**  
8 **Chun Luo**<sup>2</sup> and **Long Kang**<sup>2</sup>

9

10 <sup>1</sup> *State Key Laboratory of Advanced Processing and Recycling of Non-ferrous Metals,*

11 *Lanzhou University of Technology, Lanzhou 730050, P. R. China*

12 <sup>2</sup> *School of Materials Science and Engineering, Lanzhou University of Technology,*

13 *Lanzhou 730050, P. R. China*

14

15 *\*Corresponding author. Tel.: +86-931-2976579; Fax: +86-931-2976578; E-mail: \_*

16 *[konglb@lut.cn](mailto:konglb@lut.cn)*

17

18 This supporting information includes: Reagents, Preparation of CoS, MoS<sub>2</sub>, and

19 CoMoO<sub>4</sub>, preparation of working electrodes, Figure S1, Figure S2, Figure S3, Figure

20 S4, Figure S5, and Figure S6, Table S1.

21

## 22 **Reagents**

1 Analytical grade  $\text{CoCl}_2 \cdot 6\text{H}_2\text{O}$ ,  $\text{NaMoO}_4 \cdot 2\text{H}_2\text{O}$ ,  $(\text{NH}_4)_2\text{Mo}_7\text{O}_{24} \cdot 4\text{H}_2\text{O}$ ,  $(\text{NH}_4)_2\text{S}$ ,  
2  $\text{Na}_2\text{S} \cdot 9\text{H}_2\text{O}$ , and  $\text{KOH}$  were purchased from Sinopharm Chemical Reagent Co. Ltd.  
3 and used as received without any further purification. Nickel foam was purchased  
4 from ChangSha Lyrun New Material Co. Ltd, and was washed with acetone and  
5 double-distilled water for several times and dried at  $60\text{ }^\circ\text{C}$  before using.

6

### 7 **Preparation of CoS**

8 In the preparation of  $\text{CoS}$ , 1 g of  $\text{CoCl}_2 \cdot 6\text{H}_2\text{O}$  was dissolved in 30 ml distilled water  
9 and stirred at  $70\text{ }^\circ\text{C}$ , then 1.2 g of  $\text{Na}_2\text{S} \cdot 9\text{H}_2\text{O}$  in 30 ml of distilled water under  
10 constant magnetic stirring and then the reaction mixture was kept at  $70\text{ }^\circ\text{C}$  for 2 h.  
11 Then the precipitate was collected and washed with distilled water and absolute  
12 ethanol for several times, and dried at  $60\text{ }^\circ\text{C}$ .

13

### 14 **Preparation of MoS<sub>2</sub>**

15 For the formation of  $\text{MoS}_2$ , 0.120 g of  $(\text{NH}_4)_2\text{Mo}_7\text{O}_{24} \cdot 4\text{H}_2\text{O}$  and 0.240 g of  
16 thioacetamide were dissolved in 80 ml of distilled water with continuous stirring.<sup>1</sup>  
17 The as-obtained mixture was loaded into a Teflon-lined stainless steel autoclave and  
18 heated at  $200\text{ }^\circ\text{C}$  for 24 h. After heating, the Teflon reactor was cooled to room  
19 temperature naturally and then the mixture was washed with distilled water and  
20 absolute ethanol for several times, and dried at  $60\text{ }^\circ\text{C}$ .

21

### 22 **Preparation of CoMoO<sub>4</sub>**

1  $\text{CoMoO}_4$  were fabricated as follows: 1 g of  $\text{CoCl}_2 \cdot 6\text{H}_2\text{O}$  was dissolved in 30 ml  
2 distilled water and stirred at 70 °C, then 30 ml distilled water containing 1.02 g of  
3  $\text{NaMoO}_4 \cdot 2\text{H}_2\text{O}$  was added dropwise and stirred for 2 h. The pink solid was filtered,  
4 washed and dried at 60 °C.

5

### 6 **Working electrode preparation**

7 The working electrodes were prepared by mixing 80 wt% electro-active material, 7.5  
8 wt% acetylene black and 7.5 wt% conducting graphite in an agate mortar until a  
9 homogeneous black powder was obtained. Then, 5 wt% poly(tetrafluoroethylene) was  
10 added into this mixture together with a few drops of ethanol. After briefly allowing  
11 the solvent to evaporate, the resulting slurry was pressed to nickel foam with a nickel  
12 wire for an electric connection. Subsequently, the electrode was dried for 10 h at 60  
13 °C in air. Each electrode contained approximately 4 mg of electrode material and had  
14 a geometric surface area of 1  $\text{cm}^2$ .

15

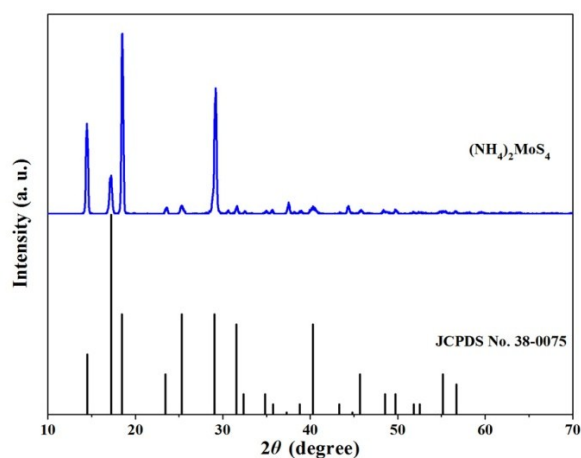

16

17

**Figure S1** XRD pattern of the  $(\text{NH}_4)_2\text{MoS}_4$  sample.

18

1 Figure S1 shows the XRD patterns of the as-prepared  $(\text{NH}_4)_2\text{MoS}_4$  samples. The  
 2 XRD patterns of  $(\text{NH}_4)_2\text{MoS}_4$  are in good agreement with the standard patterns for  
 3  $(\text{NH}_4)_2\text{MoS}_4$  (JCPDS card no. 38-0075), indicating the formation of  $(\text{NH}_4)_2\text{MoS}_4$   
 4 phase. While the intensities of the peaks for the experimental sample of  $(\text{NH}_4)_2\text{MoS}_4$   
 5 do not match those of the JCPDS file perfectly, this may be due to preferred  
 6 orientation effects.

7

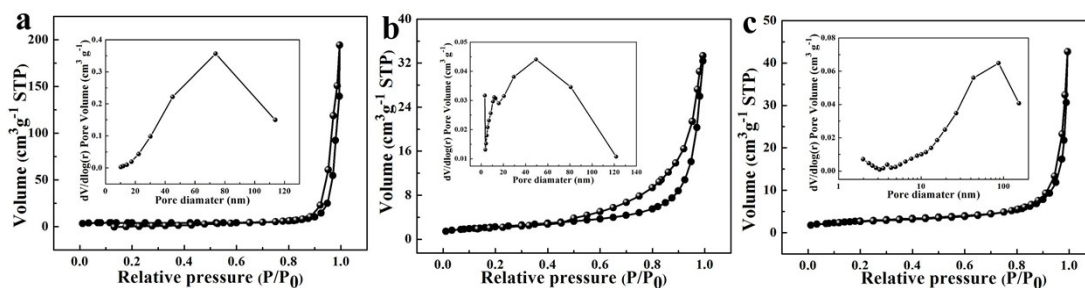

8

9 **Figure S2** The nitrogen adsorption-desorption isotherms of (a) CoS, (b) MoS<sub>2</sub>, (c)  
 10 CoMoO<sub>4</sub>, and the corresponding pore size distributions (inset) calculated from the  
 11 adsorption branches of the isotherms at -196 °C using the Barrett-Joyner-Halenda  
 12 (BJH) theory model.

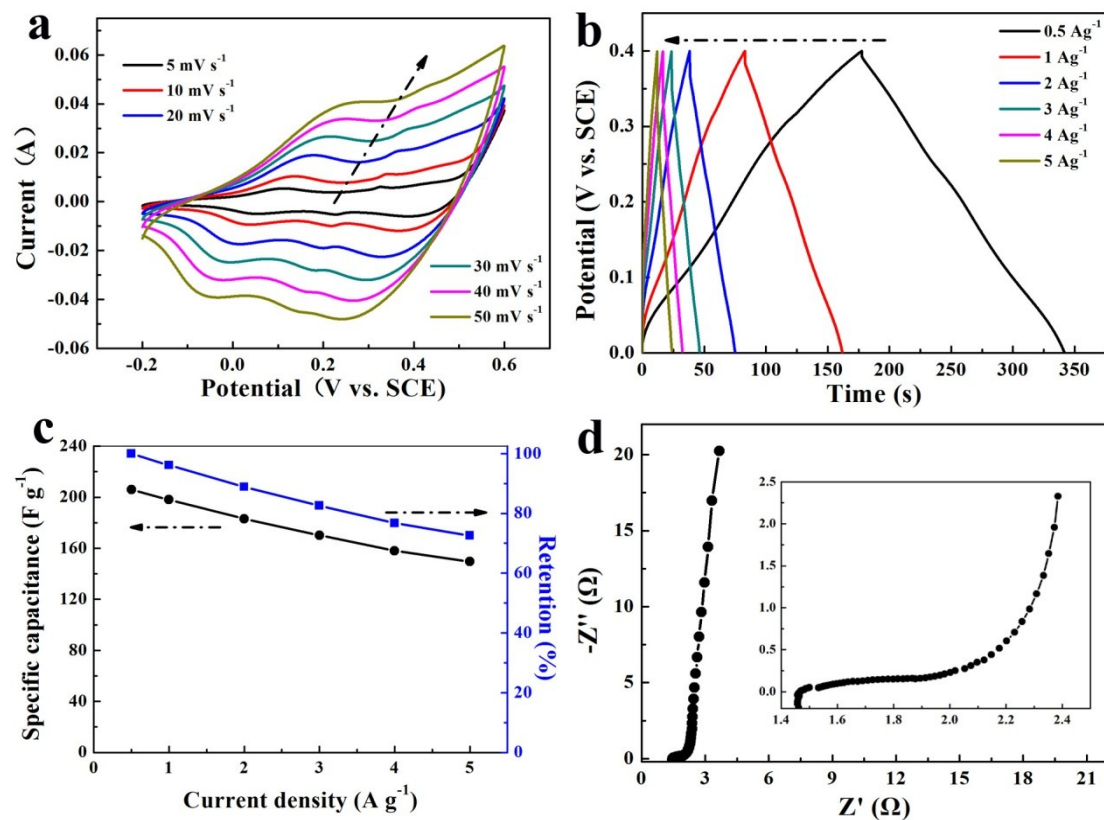

1  
2 **Figure S3** Electrochemical performance of CoS in 6 M KOH aqueous electrolyte: (a)  
3 CV curves at various scan rates, (b) Charge-discharge curves at various current  
4 densities, (c) The specific capacitance as a function of discharge current density, (d)  
5 EIS curve measured in the frequency range from 10<sup>5</sup> Hz to 10<sup>-2</sup> Hz at the open circuit  
6 voltage with an alternate current amplitude of 5 mV.

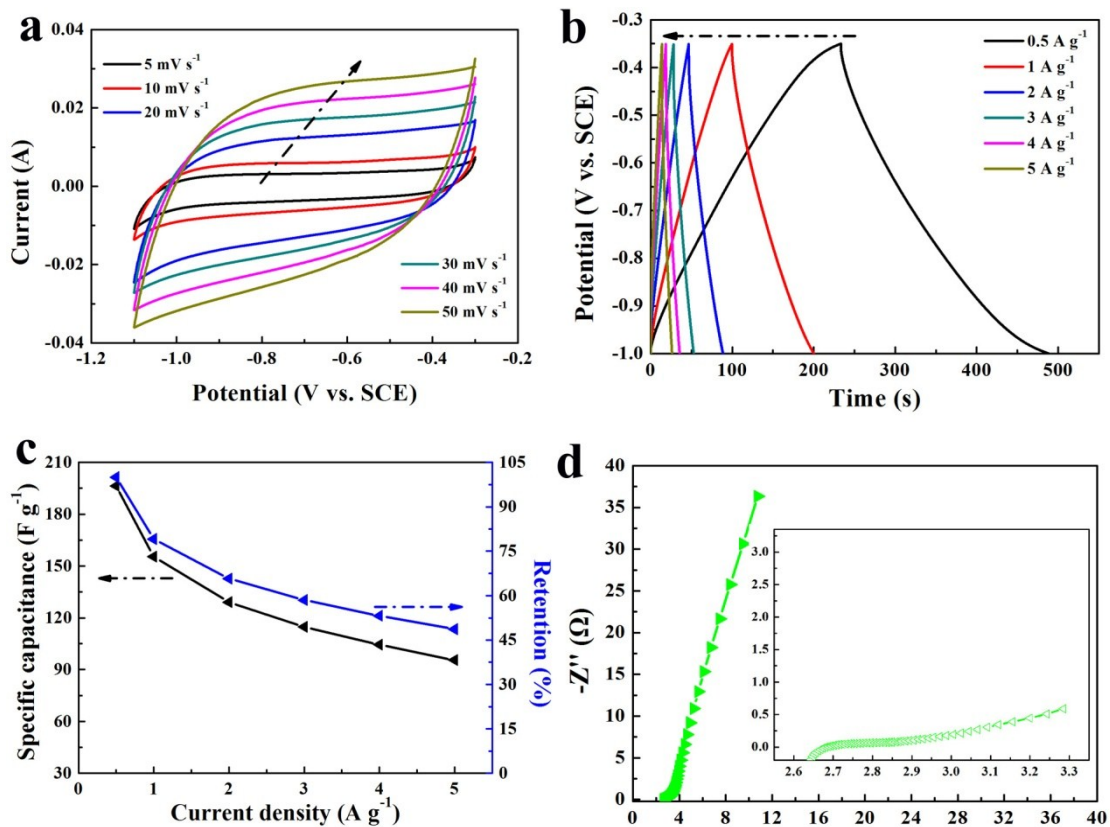

1  
2 **Figure S4** Electrochemical performance of MoS<sub>2</sub> in 1 M Na<sub>2</sub>SO<sub>4</sub> neutral electrolyte:  
3 (a) CV curves at various scan rates, (b) Charge–discharge curves at various current  
4 densities, (c) The specific capacitance as a function of discharge current density, (d)  
5 EIS curve measured in the frequency range from 10<sup>5</sup> Hz to 10<sup>-2</sup> Hz at the open circuit  
6 voltage with an alternate current amplitude of 5 mV.

7

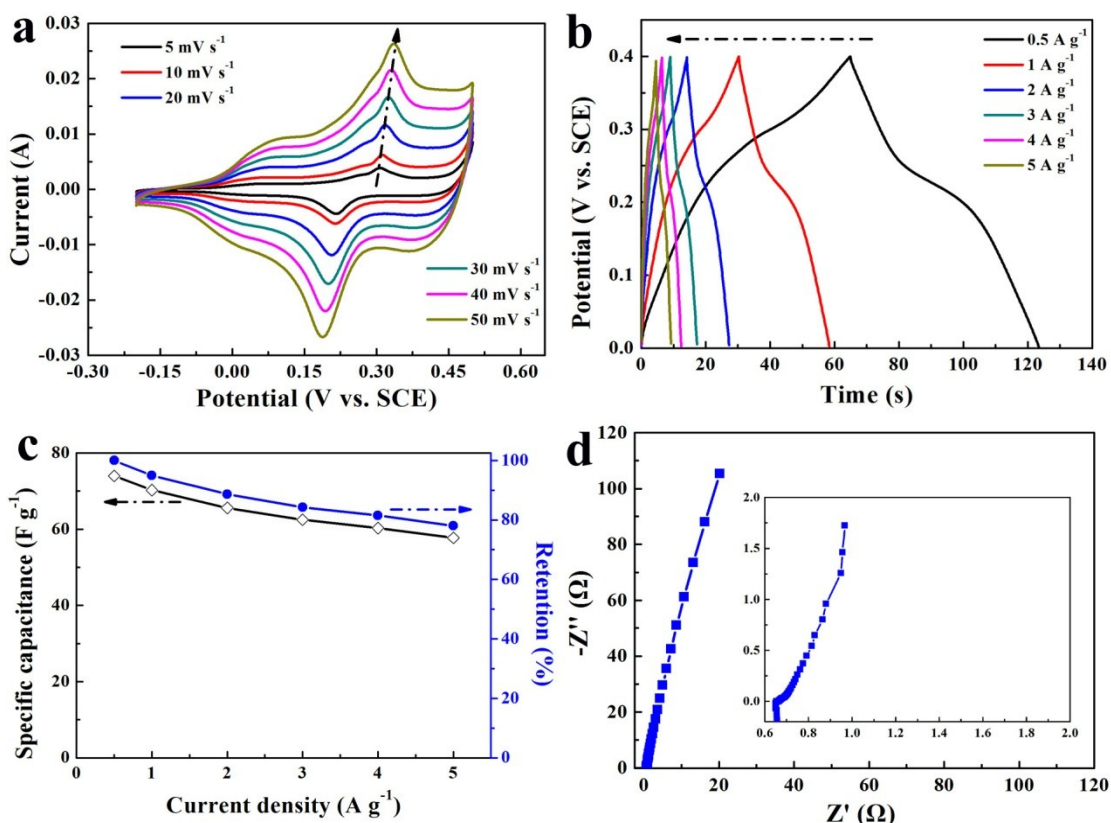

1  
 2 **Figure S5** Electrochemical performance of CoMoO<sub>4</sub> in 6 M KOH aqueous electrolyte:  
 3 (a) CV curves at various scan rates, (b) Charge–discharge curves at various current  
 4 densities, (c) The specific capacitance as a function of discharge current density, (d)  
 5 EIS curve measured in the frequency range from 10<sup>5</sup> Hz to 10<sup>-2</sup> Hz at the open circuit  
 6 voltage with an alternate current amplitude of 5 mV.

7

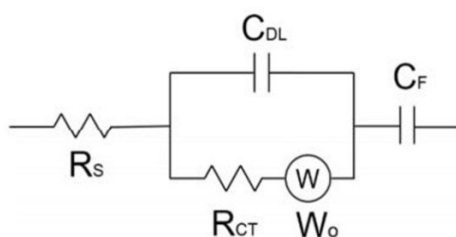

8  
 9 **Figure S6.** An equilibrium circuit used to fit the Nyquist plot using the software  
 10 Zsimpwin. ( $R_S$ : Cell internal resistance,  $R_{CT}$ : Charge transfer resistance,  $C_{DL}$ : Double  
 11 layer capacitance,  $W_o$ : Warburg diffusion element,  $C_F$ : Faradic capacitance.)

12

13 **Table S1.** Equivalent circuit parameters obtained by using fitting program.

| Samples            | $R_S$ ( $\Omega$ ) | $C_{DL}$ ( $\mu F$ ) | $R_{CT}$ ( $\Omega$ ) | $W_o$ ( $\Omega \cdot s^{-1/2}$ ) | $C_F$ (F) |
|--------------------|--------------------|----------------------|-----------------------|-----------------------------------|-----------|
| MoS <sub>2</sub>   | 2.711              | 2050                 | 0.1272                | 0.6216                            | 0.4906    |
| CoS                | 1.534              | 6392                 | 0.0594                | 1.5910                            | 0.7368    |
| CoMoO <sub>4</sub> | 0.717              | 83710                | 0.0355                | 0.0163                            | 1.324E18  |
| CoMoS <sub>4</sub> | 0.620              | 531                  | 0.0100                | 3.0910                            | 0.9942    |

14

15

## 1 References

- 1 A. Ramadoss, T. Kim, G. S. Kima and S. J. Kim, *New J. Chem.*, 2014, **38**, 2379.
